# Supplementary material for: [18F] Clofarabine for PET Imaging of Hepatocellular Carcinoma
Source: MDPI journal article supplement (doi:10.3390/cancers11111748), 2019-11-07
Supplement: s1 [file s1]

## Supplementary Materials: [<sup>18</sup>F] Clofarabine for PET Imaging of Hepatocellular Carcinoma

**Purine-nucleoside: orthophosphate ribosyltransferase (EC 2.4.2.1) <sup>1,2)</sup>**

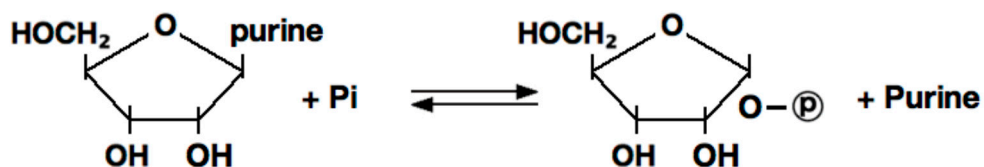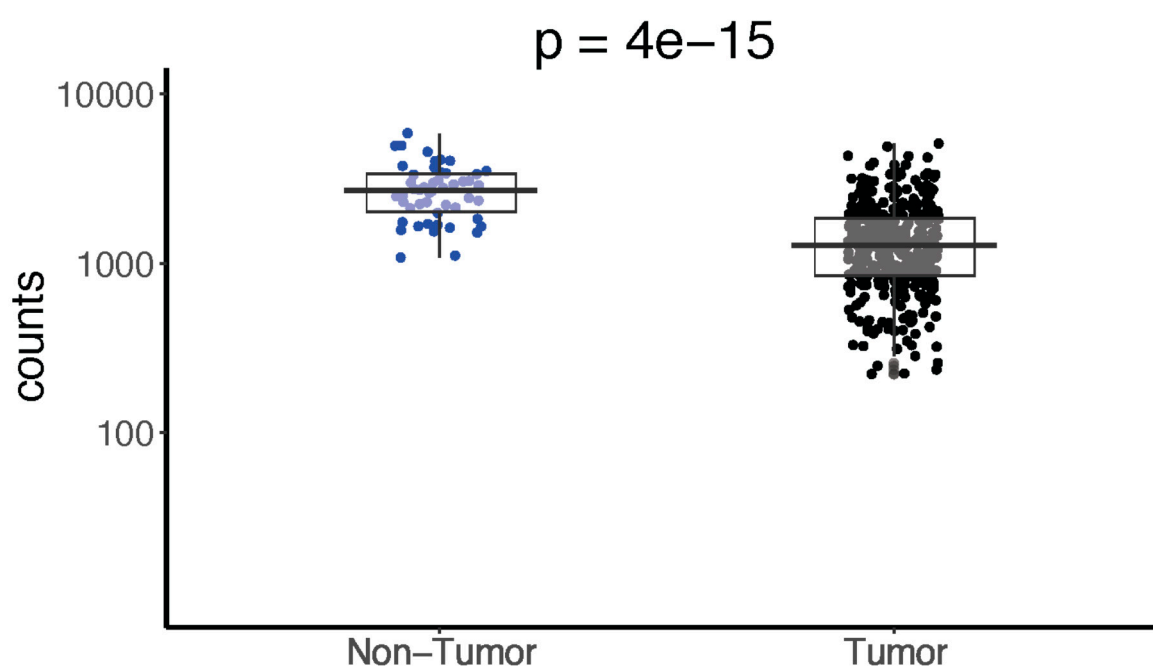

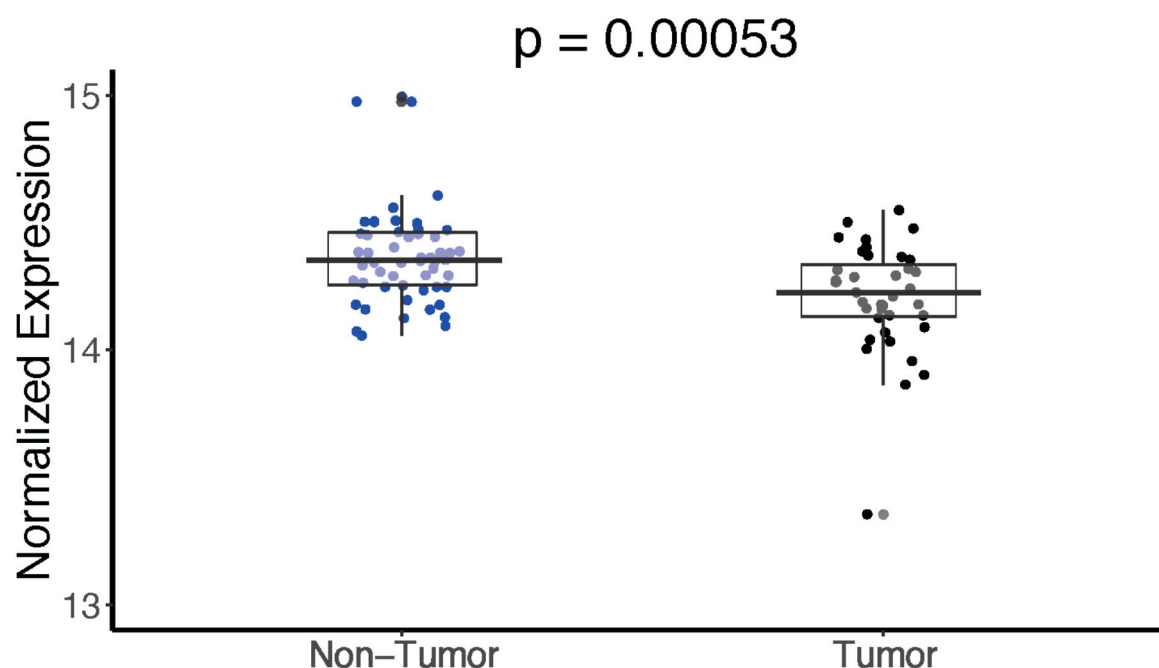

**Figure S1.** PNP levels in the liver. PNP has a significantly higher expression, in terms of the base main counts in either RNA-seq (human) or microarray (woodchuck) data, in the liver parenchyma than in HCC for human and woodchuck. The enzyme works reversibly in both directions.

## The FASTA results

### 1. PNP alignment between

Query: NCBI Reference Sequence: NP\_000261.2; purine nucleoside phosphorylase [Homo sapiens]

Sbjct: NCBI Reference Sequence: XP\_015336353.1; PREDICTED: purine nucleoside phosphorylase [Marmota marmota marmota]

| Identities    | Positives                                                    | Gaps       |
|---------------|--------------------------------------------------------------|------------|
| 251/288 (87%) | 265/288 (92%)                                                | 0/288 (0%) |
| Query 1       | MENGYTYEDYKNTAEWLLSHTKHPQVAIICGSLGGLTDKLTQAQIFDYGEIPNFPST    | 60         |
| Sbjct 1       | MEN +TYEDY+ TAEWLLS TKHRPQVA+ICGSLGGLT+KLT+AQ FDY EIPNFP+ST  | 60         |
| Query 61      | VPGHAGRLVFGFLNGRACVMMQGRFHYEGYPLWKVTFPVRVFHLLGVDTLVVTNAAGGL  | 120        |
| Sbjct 61      | VPGHAGRLVFGFLN +ACVMMQGRFH YEGYPLWKVTFPVRVF LLGVDTLVVTNAAGGL | 120        |
| Query 121     | NPKFEVGDIMLIRDHINLPGFSGQNPLRGPNDRFGDRFPAMSDAYDRTMRQALSTWKQ   | 180        |
| Sbjct 121     | NP F+VGDIMLIRDHINLPG GQNPL+GPNDERFG RFPAMSDAYDR MR++ALSTWK   | 180        |
| Query 181     | MGEQRELQEGTYVMVAGPSFETVAECRVLQKLGADAVGMSTVPEVIVARHCGLRVFGFSL | 240        |
| Sbjct 181     | MGE RELQEGTYVMVAGPSFETVAE R+LQ+LGADAVGMSTVPEVIVARHCGLRVFGFSL | 240        |
| Query 241     | ITNKVIMDYESLEKANHEEVLAAGKQAAQKLEQFVSILMASIPLPKA              | 288        |
| Sbjct 241     | ITNKVIMDYESLEK HEEVL GKQAAQKLE+FVSILMASIP D A                | 288        |

## 2. ENT1 alignment between

Query: UniProtKB/Swiss-Prot: Q99808.3; S29A1\_HUMAN RecName: Full=Equilibrative nucleoside transporter 1; AltName: Full=Equilibrative nitrobenzylmercaptapurine riboside-sensitive nucleoside transporter; Short=Equilibrative NBMPR-sensitive nucleoside transporter; AltName: Full=Nucleoside transporter, es-type; AltName: Full=Solute carrier family 29 member 1

Sbjct: NCBI Reference Sequence: XP\_015342854.1; PREDICTED: equilibrative nucleoside transporter 1 [Marmota marmota marmota]  
222

| Identities   |     | Positives                                                     | Gaps      |
|--------------|-----|---------------------------------------------------------------|-----------|
| 404/464(87%) |     | 421/464(90%)                                                  | 9/464(1%) |
| Query        | 2   | TTSHQPQDRYKAVWLIFFMLGLGTLTPWNFFMTATQYFTNRLDMSQNVSLVTAELSKDAQ  | 61        |
| Sbjct        | 77  | TTSHQPQDRYKAVWLIFFMLGLGTLTPWNFFMTAT+YFTNRLDMSQNVSL A LSKD Q   | 136       |
| Query        | 62  | ASAAPAAPLPERNSLSAIFNNVMTLCAMPLPLLLFTYLNSFLHQRIPQSVRILGSLVAILL | 121       |
| Sbjct        | 137 | A P APLPE+ SLSAIFNNVMTLCAMPLPLLLF+ LNSFLHQRIPQSVRILGSLVAILL   | 196       |
| Query        | 122 | VFLITAILVKVQLDALPFFVITMIKIVLINSFGAILQGSFLFGLAGLLPASYPIMSGQG   | 181       |
| Sbjct        | 197 | VFL+TAILVKVQLDALPFFV TMIKI+LINSFGAILQGSFLFGLAGLLPA+YTAPIMSGQG | 256       |
| Query        | 182 | LAGFFASVAMICAIASGSELSAFAFYFITACAVIILTIICYLGLPRLEFYRYQQQKLE    | 241       |
| Sbjct        | 257 | LAG FASVAMICAIASGSELSAFAFYFITAC V+IL IICYLGLPRLEFYRYQQQKLE    | 316       |
| Query        | 242 | GPGEQETKLDLISK-----GEEPRAGKEESGVSVSNSOPTNESHSHKAILKNISVL      | 292       |
| Sbjct        | 317 | GPGEQETKLDLISK GEEPR KEESGV NSQ T+ + SI+AILKNISVL             | 376       |
| Query        | 293 | AFSVCFIPTITIGMFPAVTVEVKSSIAGSSTWERYFIPVSCFLTFFNIFDWLGRSLTAVFM | 352       |
| Sbjct        | 377 | A SVC FT+TIG+FPAAVT EVKSSIAG+S W YFIPVSCFLTFFNIFDWLGRSLTAVFM  | 436       |
| Query        | 353 | WPGKDSRWLPSLVARLVFVPLLLLCNIPRRYLTVVFEHDAWFIFMAAFASFNGYLAS     | 412       |
| Sbjct        | 437 | WPGKDS WLPVLV+ARLVFVPLLLLCN+ PRRYL VVF+HDAW+IFFMAAFASFNGYLAS  | 496       |
| Query        | 413 | LCMCFGPKKVKPAEAETAGAIMAFFLCLGLALGAVFSFLFRAIV                  | 456       |
| Sbjct        | 497 | LCMCFGPKKVKPAEAETAGAIM FFL LGLALGAV SFL RAIV                  | 540       |

### 3. ENT2 alignment between

Query: NCBI Reference Sequence: NP\_001523.2 equilibrative nucleoside transporter 2 isoform a; SLC29A2 [Homo sapiens]

Sbjct: NCBI Reference Sequence: XP\_015358637.1 PREDICTED: equilibrative nucleoside transporter 2 isoform X1 [Marmota marmota marmota]

| Identities   |     | Positives                                                     |     | Gaps      |  |
|--------------|-----|---------------------------------------------------------------|-----|-----------|--|
| 308/339(91%) |     | 318/339(93%)                                                  |     | 3/339(0%) |  |
| Query        | 121 | MSPGPFFSITMASVCFINSFSAVLQGSILFGQLGTMPTSTYTLFLSGQGLAGIFAALAMLL | 180 |           |  |
|              |     | MSPGPFFSITM SV FINSF AVLQGSILFGQLGTMPTSTYTLFLSGQGLAGIFAALAML+ |     |           |  |
| Sbjct        | 1   | MSPGPFFSITMVSVMFINSFCAVLQGSILFGQLGTMPTSTYTLFLSGQGLAGIFAALMLM  | 60  |           |  |
| Query        | 181 | SMASGVDAETSALGYFITPCVGILMSIVCYLSLPHLKFARYYLANKSSQAQAQAELETKAE | 240 |           |  |
|              |     | SMASGVDA+TSALGYFITPCVGILMSIVCYLSLPHL+FARYYLA K S++ ELETKAE    |     |           |  |
| Sbjct        | 61  | SMASGVDAQTSALGYFITPCVGILMSIVCYLSLPHLEFARYYLAKKPSRSPTHELETKAE  | 120 |           |  |
| Query        | 241 | LLQSDE-NGIPSSPQKVALTLDLDLEKEPESEPDEP--QKPGKPSVFTVFQKIWLTAALCL | 297 |           |  |
|              |     | LLQ+DE NGIPSSPQ LTLDLD EKEPE EP+ QK KPSVF VFQKIWLTAALCL       |     |           |  |
| Sbjct        | 121 | LLQADEKNGIPSSPQVATLTLDLDPEKEPELEPELDEPQKLEKPSVFIVFQKIWLTAALCL | 180 |           |  |
| Query        | 298 | VLVFTVTLVSFPAITAMVTSSTSPGKWSQFFNPICCFLLFNIMDWLGRSLTSYFLWPDED  | 357 |           |  |
|              |     | VLVFTVTLVSFPAITAMVTSSTSPGKWSQFFNPICCFLLFN+MDWLGRSLTSYFLWPDED  |     |           |  |
| Sbjct        | 181 | VLVFTVTLVSFPAITAMVTSSTSPGKWSQFFNPICCFLLFNMDWLGRSLTSYFLWPDED   | 240 |           |  |
| Query        | 358 | SRLPLLVCLRFLFVPLFMLCHVPQRSRLPILFPQDAYFITFMLLFAVSNGYLVSLTMCL   | 417 |           |  |
|              |     | SRLPLLVCLRFLFVPLFMLCHVP+R+RLPILFPQDAYFITFMLLFAVSNGYLVSLTMCL   |     |           |  |
| Sbjct        | 241 | SRLPLLVCLRFLFVPLFMLCHVPERARLPILFPQDAYFITFMLLFAVSNGYLVSLTMCL   | 300 |           |  |
| Query        | 418 | APRQVLPHEREVAGALMTFFLALGLSCGASLSFLFKALL                       | 456 |           |  |
|              |     | APRQVLPHEREVAGALMTFFLALGLSCGASLSFLFKALL                       |     |           |  |
| Sbjct        | 301 | APRQVLPHEREVAGALMTFFLALGLSCGASLSFLFKALL                       | 339 |           |  |

## 4. UGT1A1 alignment between

Query: NCBI Reference Sequence: NP\_000454.1; UDP-glucuronosyltransferase 1-1 precursor [Homo sapiens]

Sbjct: NCBI Reference Sequence: XP\_015337083.1; PREDICTED: UDP-glucuronosyltransferase 1-1 isoform X2 [Marmota marmota marmota]

| Identities   |     | Positives                                                     | Gaps      |  |
|--------------|-----|---------------------------------------------------------------|-----------|--|
| 433/533(81%) |     | 472/533(88%)                                                  | 0/533(0%) |  |
| Query        | 1   | MAVESQGGRLVLGLLLCVLGPVSHAGKILLIPVDGSHWLSMLGAIQQLQQRGHEIVVL    | 60        |  |
|              |     | MAV SQG L+LGLLLCVL P +SHA K+L+IPVDGSHWLSM+G IQQLQ+RGHE+VV+    |           |  |
| Sbjct        | 1   | MAVVSQGPCTLLLGLLLCVLNPSISHAEKLLIIPVDGSHWLSMVGVIQQLQQRGHEMVVI  | 60        |  |
| Query        | 61  | APDASLYIRDGAFYTLKTYPVFPQREDVKESFVSLGHNVFENDSFLQRVIKTYKKIKKDS  | 120       |  |
|              |     | P+AS++I++ +FY+LK YPVFPQ+EDV+ SF LG FEN FLQ V K Y+K +KDS       |           |  |
| Sbjct        | 61  | TPEASIIHKEASFYSLKKYPVPFQKEDVETSFAELGFYAFENVFPFLQGVAKMYEKAQKDS | 120       |  |
| Query        | 121 | AMLLSGCSHLLHNKELMASLAESSFDVMLTDPFLPCSPIVAQYLSLPTVFFLHALPCSLE  | 180       |  |
|              |     | A+LLSGCSHLLHNKE MASL ES FD +LTDPFPLC IVAQYL LP V FL+ALPC L+   |           |  |
| Sbjct        | 121 | AVLLSGCSHLLHNKEFMASLVESDFDAVLTDPFPLPCGSIVAQYLDLPVFNFLNALPCGLD | 180       |  |
| Query        | 181 | FEATQCPNPFSSYVPRPLSSSDHMTFLQRVKNMLIAFSQNFCDVVYSPYATLASEFLQR   | 240       |  |
|              |     | +ATQCP+P SYVPR LSS+SDHMTFLQRVKNMLIA +NFLC +VYSPYA LAS+ LQR    |           |  |
| Sbjct        | 181 | LKATQCPSPLSYVPRALSSNSDHMTFLQRVKNMLIALLENFLCSMVYSPYAALASQVLQR  | 240       |  |
| Query        | 241 | EVTVDLLSSASVWLFVDFKDYPRPIMPNMVVFVGGINCLHQNPLSQEFEAYINASGEH    | 300       |  |
|              |     | ++T+QDLLSSASVWL R DFVKDYP PIMPNMVVFVGGINCLH P+SQEFEAY+NASGEH  |           |  |
| Sbjct        | 241 | DLTLQDLLSSASVWLMRKDFVKDYPMPIMPNMVVFVGGINCLHTKPISQEFEAYVNASGEH | 300       |  |
| Query        | 301 | GIVVFSGLSMVSEIPEKKAMAIADALGKIPQTVLWRYTGTRPSNLNNTILVKWLPQNDL   | 360       |  |
|              |     | GIVVFSGLSMVSEIPEKKAM IADALG+IPQTVLWRYTGT PSNLA NT LVKWLQNDL   |           |  |
| Sbjct        | 301 | GIVVFSGLSMVSEIPEKKAMEIADALGRIPQTVLWRYTGTPPSNLAKNTKLKWLQNDL    | 360       |  |
| Query        | 361 | LGHPMTRAFITHAGSHGVYESICNGVPMVMMPFLFGDQMDNAKRMETKGAGVTNLVLEMTS | 420       |  |
|              |     | LGHP TRAFITHAGSHGVYE ICNGVPMVMMPFLFGDQMDNAKRMET+GAGVTNLVLEMTS |           |  |
| Sbjct        | 361 | LGHPKTRAFITHAGSHGVYEGICNGVPMVMMPFLFGDQMDNAKRMETRGAGVTNLVLEMTS | 420       |  |
| Query        | 421 | EDLENALKAVINDKSYKENIMRLSSLHKDRPVEPLDLAVFWVEFVMRHKGAPHLRPAHD   | 480       |  |
|              |     | +DL NALKAVINDKSYKENIMRLS LHKDRP+EPLDLAVFWVEFVMRHKGAPHLRPAHD   |           |  |
| Sbjct        | 421 | DDLANALKAVINDKSYKENIMRLSRLHKDRPIEPLDLAVFWVEFVMRHKGAPHLRPAHD   | 480       |  |
| Query        | 481 | LTWYQYHSLDVIGFLLAVLTVAFITFKCCAYGYRKCLGKKGRVKKAHKSKTH          | 533       |  |
|              |     | LTWYQYHSLDVIGFLLA+VL VAFI FKCCAYG RKC GKKG VKK HSK H          |           |  |
| Sbjct        | 481 | LTWYQYHSLDVIGFLLAIVLGVAFAFKCCAYGCRKCFGKKGSVKKGHKSKAH          | 533       |  |



## 5. UGT1A9 alignment between

Query: NCBI Reference Sequence: NP\_066307.1; UDP-glucuronosyltransferase 1-9 precursor [Homo sapiens]

Sbjct: NCBI Reference Sequence: XP\_015337084.1; PREDICTED: UDP-glucuronosyltransferase 1-9 isoform X3 [Marmota marmota marmota]

| Identities   | Positives                                                     | Gaps      |
|--------------|---------------------------------------------------------------|-----------|
| 429/521(82%) | 463/521(88%)                                                  | 0/521(0%) |
| Query 10     | LPLCVCLLLTCGFAEAGKLLVVPMDGSHWFTMRSVVEKLILRGHEVVVVMPPEVSWQLGRS | 69        |
|              | LPLCVCLLL A+AGKLLVVPMDGSHWFTMRSVVEKL+ RG+EVV VMPEVSWQLG+S     |           |
| Sbjct 10     | LPLCVCLLLASSSAQAGKLLVVPMDGSHWFTMRSVVEKLVHRGNEVVAVMPEVSWQLGQS  | 69        |
| Query 70     | LNCTVKTYSTSYTLEDLDREFKAFHAHQWKAQVRSIYSLLMGSYNDIFDLFFSNCRSLFK  | 129       |
|              | LN TVKTYSTSYTLEDLDR F F QWK +S+YS MGS FD+ FS CRSLF            |           |
| Sbjct 70     | LNFTVKTYSTSYTLEDLDRGFNFVDTQWKTPQSMYSAAMGSSKAFFDITFSRCRSLFN    | 129       |
| Query 130    | DKKLVEYLKESSFDAVFLDPDNCGLIVAKYFSLPSVVFARGILCHYLEEGAQCPAPLSY   | 189       |
|              | DKKLVEYLKE+SFDAVFLDPFD CGL+VAKYFSLPSVVFAR + C++LE+GAQCP+PLSY  |           |
| Sbjct 130    | DKKLVEYLKETSFDAVFLDPDVCGLVVAKYFSLPSVVFARVVCNLFEDGAQCPSPLSY    | 189       |
| Query 190    | VPRILLGFSDAMTFKERVNRHIMHLEEHLLCHRFKNALEIASEILQTPVTEYDLYSHTS   | 249       |
|              | VPR+ L SDA++F ER+RNH+ +LEE+L C FF+ ALE+ASEIL+TPVT DL+S S      |           |
| Sbjct 190    | VPRVFLMSSDALSFMERIRNHLNLYEEYLFQPYFFQTALVASEILRTPVTIGDLFSQIS   | 249       |
| Query 250    | IWLLRTDFVLDYPKVMPNMIFIGGINCHQKPLPMEFEAYINASGEHGIVVFSLGSMVS    | 309       |
|              | IWLLRTDFVL+YP+PVMNMF+GGINCHQ KPLP EFEAY+NASGEHGIVVFSLGSMVS    |           |
| Sbjct 250    | IWLLRTDFVLEYPRVMPNMIFVGGINCHQKPLPKEFEAYVNASGEHGIVVFSLGSMVS    | 309       |
| Query 310    | EIPEKKAMAIADALGKIPQTVLWRYTGTRPSNLANTILVKWLPQNDLLGHPMTRAFITH   | 369       |
|              | EIPEKKAM IADALG+IPQTVLWRYTGT PSNLA NT LVKWLPQNDLLGHP TRAFITH  |           |
| Sbjct 310    | EIPEKKAMEIADALGRIPQTVLWRYTGTTPPSNLAKNTKLKWLPQNDLLGHPKTRAFITH  | 369       |
| Query 370    | AGSHGVYESICNGVPMVMMPFLFGDQMDNAKRMETKGAGVTNLVLEMTSEDLENALKAVIN | 429       |
|              | AGSHGVYE ICNGVPMVMMPFLFGDQMDNAKRMET+GAGVTNLVLEMTS+DL NALKAVIN |           |
| Sbjct 370    | AGSHGVYEGICNGVPMVMMPFLFGDQMDNAKRMETRGAGVTNLVLEMTSDDLANKAVIN   | 429       |
| Query 430    | DKSYKENIMRLSSLHKDRPVEPLDLAVFWVEFVMRHKGAPHLRPAAHDLTWYQYHSLDVI  | 489       |
|              | DKSYKENIMRLS LHKDRP+EPDLAVFWVEFVMRHKGAPHLRPAAHDLTWYQYHSLDVI   |           |
| Sbjct 430    | DKSYKENIMRLSRLHKDRPIEPLDLAVFWVEFVMRHKGAPHLRPAAHDLTWYQYHSLDVI  | 489       |
| Query 490    | GFLLAIVLTVAFITFKCCAYGYRKCLGKKGRVKKAHKSKTH                     | 530       |
|              | GFLLA+VL VAFI FKCCAYG RKC GKKG VKK HSK H                      |           |
| Sbjct 490    | GFLLAIVLGVAFI AFKCCAYGCRKCFGKKGSVKKGHKS KA H                  | 530       |

## 6. UGT2B4 alignment between

Query: NCBI Reference Sequence: NP\_066962.2; UDP-glucuronosyltransferase 2B4 isoform 1 precursor [Homo sapiens]

Sbjct: NCBI Reference Sequence: XP\_015337650.1 PREDICTED: UDP-glucuronosyltransferase 2B4-like [Marmota marmota marmota]

| Identities  | Positives                                                     | Gaps        |
|-------------|---------------------------------------------------------------|-------------|
| 54/115(47%) | 60/115(52%)                                                   | 44/115(38%) |
| Query 250   | MAKADIWLIRNYWDFQFPHPLLPNVEFVGGLHCKPAKPLPKEME EFVQSSGENGVVVFSL | 309         |
|             | MAKADIWLI YWD +F H LPNV+ VGGLHC+PAK LP                        |             |
| Sbjct 1     | MAKADIWLICTYWDLEFSHSTLPNVDIVGGLHCRPAKSLP-----                 | 40          |
| Query 310   | GSMVNTSEERANVIASALAKIPQKVLWRFDGNKPD TLGLNTRLYKWIPQNDLLG       | 364         |
|             | K+LWRFDG KPD TLGLN +LYKWIP+ DLLG                              |             |
| Sbjct 41    | -----KILWRFDGKKPD TLGLNIQLYKWIPKGDLLG                         | 71          |

## 7. UGT2B4 alignment (alternative)

Query: NCBI Reference Sequence: NP\_066962.2; UDP-glucuronosyltransferase 2B4 isoform 1 precursor [Homo sapiens]

Sbjct: NCBI Reference Sequence: XP\_015360783.1; PREDICTED: UDP-glucuronosyltransferase 2B15-like [Marmota marmota marmota]

| Identities    |     | Positives                                                     | Gaps       |
|---------------|-----|---------------------------------------------------------------|------------|
| 388/530 (73%) |     | 455/530 (85%)                                                 | 2/530 (0%) |
| Query         | 1   | MSMKWTSALLLIQLSCYFSSGSCGKVLVWPTEFSHWMNIKTILDELVQRGHEVTVLASSA  | 60         |
| Sbjct         | 1   | MSVKRNSVLLLIQLMCFSSGSCGKVLVWPTEYSHWINIKAILDELLQRGHEVTVLSTA    | 60         |
| Query         | 61  | SISFDPNSPSTLKFVYPVSLTKTEFEDIKQLVKRWA-ELPKDTFWSYFSQVQEIMWTF    | 119        |
| Sbjct         | 61  | SI +PN+ S + FEVYP +K E+ + + W + PKD FW ++S VQ++ +             | 120        |
| Query         | 120 | NDILRKFCCKDIVSNKKLMKKLQESRFDVVLADAVFPFGELLAELLKIPFVYSLRFSPTYA | 179        |
| Sbjct         | 121 | SDTIEQLCRNVVLNKKLMMKLHESKFDVVLADAVGPCGELLAELLKIPFVYTLRFTFGYT  | 180        |
| Query         | 180 | IEKHSGLLFPSPSYVPMSELSQMTFIERVKNMIYVLYFEFWFQIFDMKKWDQFYSEV     | 239        |
| Sbjct         | 181 | YEKYSGLTVPPSYVPIVSELSQMTFMERVKNVTYMLYFDFWFQIFDVKRWQFYSEV      | 240        |
| Query         | 240 | LGRPTTLSETMAKADIWLIRYWDFFQPHPLLPNVEFVGGLHCKPAKPLPKEMEETFVQSS  | 299        |
| Sbjct         | 241 | LGRPTTIYETMGKADFWLIRTYWDLFPRPLLPNFDVVGGLHCKPAKPLPKEMEETFVQSS  | 300        |
| Query         | 300 | GENGVVVFSLGSMVSNSTSEERANVIASALAKIPQKVLWRFDGKPDTLGLNTRLYKWIPQ  | 359        |
| Sbjct         | 301 | GENGIVVVFSLGTMVSNMPEEKANMIAFALAIQIPQVIWRFNGKKPKDGLPNTQIYEWIPQ | 360        |
| Query         | 360 | NDLLGHPKTRAFITHGGANGIYEAIYHGIPMVGVPPLFADQPDNIAHMKAKGAASLDFT   | 419        |
| Sbjct         | 361 | NDLLGHPKTAFITHGGTNGVYEAIYHGVPVMPGIPPLFADQPDNIAHVAKAGAAIRLDYRI | 420        |
| Query         | 420 | MSSTDLLNALKTVINDPLYKENAMKLSRIHHDQPVKPLDRAVFWIEFVMRHKGAKHLRVA  | 479        |
| Sbjct         | 421 | ++S DLL AL+ VINDP YKENAM+LSRI HDQPVKPLDRAVFWIEFVMRHKGAKHL+VA  | 480        |
| Query         | 480 | LTSADLLKALRMVINDPSYKENAMELSRIQHDQPVKPLDRAVFWIEFVMRHKGAKHLQVA  | 530        |
| Query         | 480 | AHDLTWFQYHSLDVTGFLACVATVIFIITK-CLFCVWKVVRTGKKGKRD             | 528        |
| Sbjct         | 481 | AHDL+WFQY+SLDV GFLACVATV+FII+K CLFC F +TGKK KR+               | 530        |

## 8. UGT2B15 alignment

Query: NCBI Reference Sequence: NP\_001067.2; UDP-glucuronosyltransferase 2B15 precursor [Homo sapiens]

Sbjct: NCBI Reference Sequence: XP\_015360783.1; PREDICTED: UDP-glucuronosyltransferase 2B15-like [Marmota marmota marmota]

| Identities    |     | Positives                                                      | Gaps       |  |
|---------------|-----|----------------------------------------------------------------|------------|--|
| 392/530 (74%) |     | 459/530 (86%)                                                  | 0/530 (0%) |  |
| Query         | 1   | MSLKWTSVFLLIQLSCYFSSGSCGKVLVWPTEYSHWINMKTILEELVQRGHEVTVLTSSA   | 60         |  |
|               |     | MS+K SV LLIQL CYFSSGSCGKVLVWPTEYSHWIN+K IL+EL+QRGHEVTVLTSA+A   |            |  |
| Sbjct         | 1   | MSVKRNSVLLLIQLMCYFSSGSCGKVLVWPTEYSHWINIKAILDELLQRGHEVTVLTSTA   | 60         |  |
| Query         | 61  | STLVNASKSSAIKLEVYPTSLTKNYLEDSSLKILDRWIYGVSKNTFWSYFSQLQELCWEY   | 120        |  |
|               |     | S L+N + +SAI EVYP +K +LE+ K + WIY K+ FW ++S +Q++ +Y            |            |  |
| Sbjct         | 61  | SILINPNTTSAINFEVYPAPSSKQHLEERFSKWIHEWIYDTPKDDFEFYSLVQKVKDY     | 120        |  |
| Query         | 121 | YDYSNKLCKDAVLNKKLMMKLQESKFDVILADALNPCGELLAELFNIPFLYSLRFSVGYT   | 180        |  |
|               |     | D +LC++ VLNKKLMMKL ESKFDV+LADA+ PCGELLAEL IPF+Y+LRF+ GYT       |            |  |
| Sbjct         | 121 | SDTIEQLCRNVVLNKKLMMKLHESKFDVVLADAVGPCGELLAELLKIPFVYTLRFTFGYT   | 180        |  |
| Query         | 181 | FEKNGGGFLFPPSYVPVVMSELSQDMIFMERIKNMIHMLYFDFWFQIYDLKKWDQFYSEV   | 240        |  |
|               |     | +EK GG PPSYVP+VMSELSQDM FMER+KN ++MLYFDFWFQI+D+K+W+QFYSEV      |            |  |
| Sbjct         | 181 | YEKYSGLTVPPSYVPIVMSELSQDMTFMERVKNTVYMLYFDFWFQIFDVKRWNQFYSEV    | 240        |  |
| Query         | 241 | LGRPTTLFETMGKAEMWLIRTYWDFEFPRPFLPNVDFVGGGLHCKPAKPLPKEMEETFVQSS | 300        |  |
|               |     | LGRPTT++ETMGKA+ WLIRTYWD EFPRP LPN DFVGGGLHCKPAKPLPKEMEETFVQSS |            |  |
| Sbjct         | 241 | LGRPTTIYETMGKADFWLIRTYWDLEFPRPLLPNDFVGGGLHCKPAKPLPKEMEETFVQSS  | 300        |  |
| Query         | 301 | GENGIVVFSLSGSMISNMSEESANMIASALAQIPQKVLWRFDGKKPNTLGSNTRLYKWLPQ  | 360        |  |
|               |     | GENGIVVFSLG+M+SNM EE ANMIA ALAQIPQKV+WRF+GKKP+ LG NT++Y+W+PQ   |            |  |
| Sbjct         | 301 | GENGIVVFSLGTVMVSNMPEEKANMIAFALAQIPQKVIWRFNKGKPKDKLPNTQIYEWIPQ  | 360        |  |
| Query         | 361 | NDLLGHPKTKAFITHGGTNGIYEAIYHGIPMVGIPFLFADQHDNIAHMKAKGAALSVDIRT  | 420        |  |
|               |     | NDLLGHPKTKAFITHGGTNG+YEAIYHG+PMVGIPFLFADQ DNIAH+KAKGAA+ +D R   |            |  |
| Sbjct         | 361 | NDLLGHPKTKAFITHGGTNGVYEAIYHGVPMVGIPFLFADQPDNIAHVAKAKGAIRLDYRI  | 420        |  |
| Query         | 421 | MSSRDLLNALKSVINDPVYKENVMKLSRIHHDQPMKPLDRAVFWIEFVMRHKGAKHLRVA   | 480        |  |
|               |     | ++S DLL AL+ VINDP YKEN M+LSRI HDQP+KPLDRAVFWIEFVMRHKGAKHL+VA   |            |  |
| Sbjct         | 421 | LTSADLLKALRMVINDPSYKENAMELSRIQHDQPVKPLDRAVFWIEFVMRHKGAKHLQVA   | 480        |  |
| Query         | 481 | AHNLTWIIQYHSLDVIAFLLACVATVIFIITKFLCFRKLAKKGKKKKRD              | 530        |  |
|               |     | AH+L+W QY+SLDVI FLLACVATV+FII+K CLFCF+ K GKK+KR+               |            |  |
| Sbjct         | 481 | AHDLWFQYYSLDVIGFLLACVATVMFIISKCLFCFQMFCKTGKKEKRE               | 530        |  |



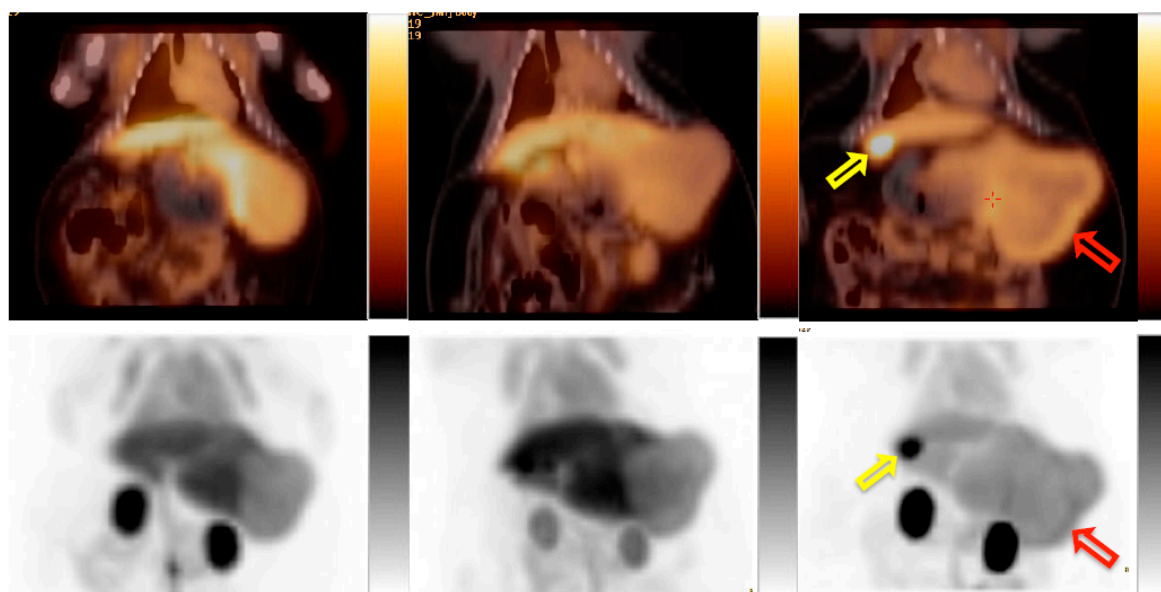

Animal C: In this animal, liver background uptake is much higher than tumor uptake. Only after cold CFA application, the uptake around the tumor rim (red arrow) can be perceived. Gallbladder (GB, yellow arrow) is clearly displayed from the PET/CT overlay and MIP (yellow arrow) with cold CFA application, which can be weakly identified from the middle panel with probenecid application.

**Figure S2.** Three-way comparison of  $[^{18}\text{F}]$ CFA uptake in tumor (red arrow) and liver. From the left: baseline, post UGT inhibitor probenecid application, and after cold CFA application. In each column, the upper panel is PET/CT overlay while the lower panel is the maximal intensity projection (MIP).

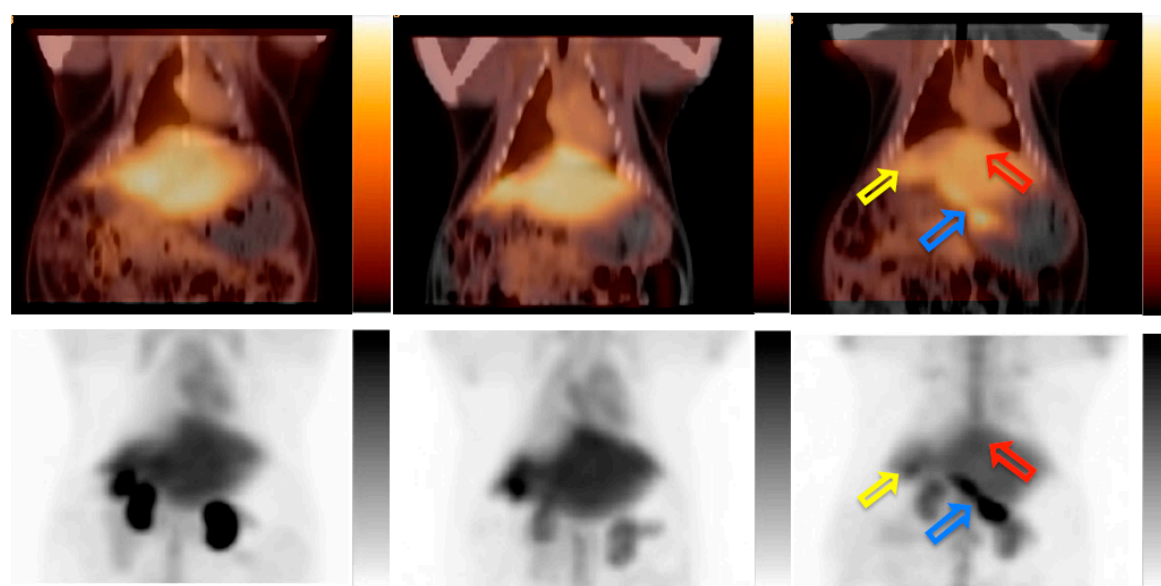

Animal D: Right column: Gallbladder (GB, yellow arrow) can be discerned from the image after cold CFA application. Cold CFA application also caused strong intestinal accumulation (blue arrow).

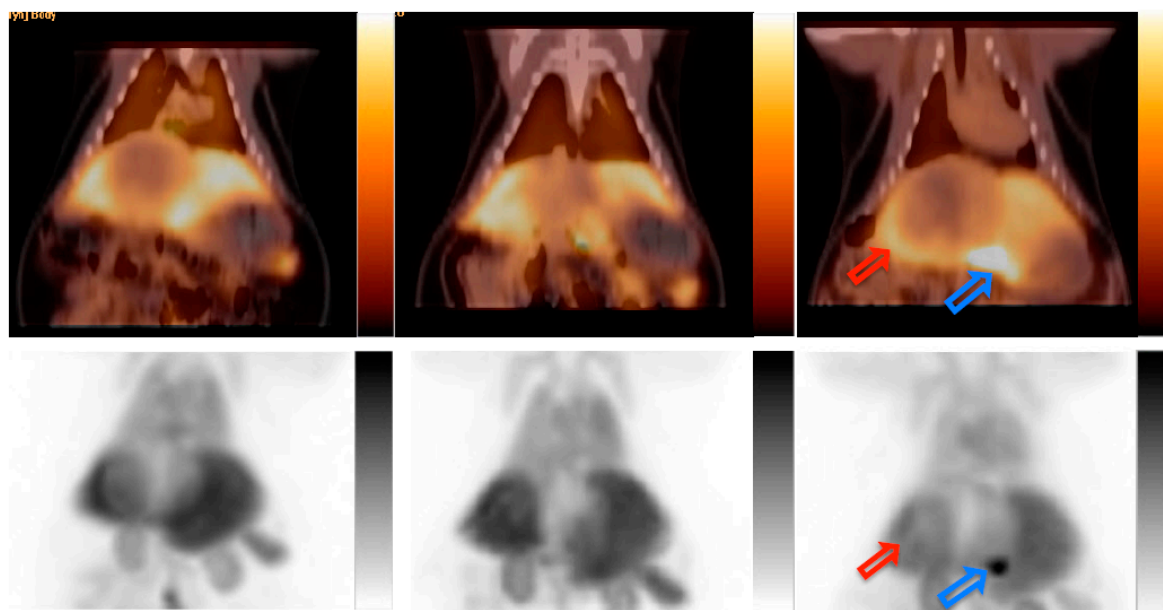

Animal E: The tumor's uptake in the proliferative rim (red arrow) with no GB but intestinal accumulation.

**Figure S3.** Three-way comparison of  $[^{18}\text{F}]\text{CFA}$  uptake in tumor (red arrow) and liver. From the left: baseline, post PNP inhibitor forodesine application, and after cold CFA application. In each column, the upper panel is PET/CT overlay while the lower panel is the maximal intensity projection (MIP).
